# Supplementary material for: Prenatal Exposure to Bisphenol A: Is There an Association between Bisphenol A in Second Trimester Amniotic Fluid and Fetal Growth?
Source: MDPI journal article supplement (doi:10.3390/medicina59050882), 2023-05-04
Supplement: s1 [file s1]

**Table S1** Chemicals, reagents, and laboratory equipment

| Chemicals and reagents                                                                                                                          | Laboratory equipment                                                                                                                              | Equipment for gas chromatography coupled with mass spectrometry                                       |
|-------------------------------------------------------------------------------------------------------------------------------------------------|---------------------------------------------------------------------------------------------------------------------------------------------------|-------------------------------------------------------------------------------------------------------|
| Bisphenol A (50 g, ≥99% purity, Sigma-Aldrich, Saint Louis, USA)                                                                                | Reax Top vortex mixer (Heidolph, Schwabach, Germany)                                                                                              | GC/MSD model 6890N.05.05/5975 Inert XL MSD (Santa Clara, USA)                                         |
| d16-bisphenol A (250 mg, ≥98% purity, Sigma-Aldrich, Saint Louis, USA)                                                                          | Dry bath (Thermo Fisher Scientific, Waltham, USA)                                                                                                 | Agilent 7683B series autosampler system (Santa Clara, USA)                                            |
| β-glucuronidase/arylsulfatase (H. pomatia, 10 mL, Roche Diagnostics, Basel, Switzerland)                                                        | Gas evaporation system connected with nitrogen (N <sub>2</sub> ) gas tank (Reacti-Vap Pierce Model 18780, Thermo Fisher Scientific, Waltham, USA) | Edwards vacuum pump (West Sussex, UK)                                                                 |
| Acetone (HPLC grade, Merck, Darmstadt, Germany)                                                                                                 | 691 digital pHmeter with glass electrode (Metrohm, Herisau, Switzerland)                                                                          | DB-5MS chromatography column, 30 m x 0.25 mm i.d x 0.25 μm film thickness (Agilent, Santa Clara, USA) |
| Methanol (HPLC grade, Merck, Darmstadt, Germany)                                                                                                | Precision balance (Radwag, Radom, Poland)                                                                                                         | Chemstation software (Hewlett Packard, California, USA)                                               |
| Ethyl acetate (HPLC grade, Merck, Darmstadt, Germany)                                                                                           | Heraeus Labofuge 400R centrifuge (Thermo Fisher Scientific, Waltham, USA)                                                                         |                                                                                                       |
| Water (HPLC grade, Sigma-Aldrich, Saint Louis, USA)                                                                                             | Automatic pipette 0.2-1.0 mL (Pipetman Classic, Gilson, Middleton, USA), with appropriate tips                                                    |                                                                                                       |
| Pentafluoropropionic anhydride (PFPA, 25g 99%, Sigma-Aldrich, Saint Louis, USA)                                                                 | Automatic pipette 0.05-0.2 mL (Pipetman Classic, Gilson, Middleton, USA), with appropriate tips                                                   |                                                                                                       |
| 1 M Sodium acetate buffer pH 5 (6.8 g of sodium acetate and 3 mL glacial acetic acid in 0.5 L H <sub>2</sub> O, adjustment to pH 5 with 1N HCl) | 10 mL glass centrifugation tubes                                                                                                                  |                                                                                                       |
|                                                                                                                                                 | 15 mL glass incubation tubes                                                                                                                      |                                                                                                       |
|                                                                                                                                                 | Glass volumetric pipettes (5.00, 10.00 mL)                                                                                                        |                                                                                                       |
